# Supplementary material for: Feasibility of a Göttingen mini-pig mini-invasive model for myocardial infarction induction
Source: Research Square preprint supplement (doi:10.21203/rs.3.rs-7373600/v1), 2025-09-15
Supplement: Supplementary file 1 [file 15868c3ea2a8b45a162147e4.docx]

**Anaesthesia for MRI procedures**

After clinical exam an access of the port catheter was achieved, and animals were sedated in an aerated transport box at the ESF with 1 mg/kg midazolam and 2 mg/kg ketamine IM. Immediately after injection, minipigs were transported from the facility to the TIC/SITEM (University of Bern), where cardiac MRI took place. Once there, if adequately sedated, they were lifted on a table, oxygen was provided through a face mask and monitoring of SpO2 and pulse rate with a pulse-oximeter was started. If sedation was deemed insufficient, further 0.2 mg/kg midazolam were injected IV. General anaesthesia was performed with propofol to effect (for baseline MRI) or etomidate 1-2 mg/kg and midazolam 0.2 mg/kg IV (for terminal MRI, when a reduction of the cardiac function was expected). After tracheal intubation, positive pressure ventilation was initiated with a TV of 8-12 ml/kg body weight, and a PEEP of 5cmH2O, targeting an end tidal carbon dioxide (ETCO2) between 40 and 45 mmHg.

Anaesthesia was deepened with sevoflurane in 100% oxygen, adjusted to maintain adequate depth of anaesthesia up to its MAC (2.7%). Dexmedetomidine 2 mcg/kg/h CRI was started before beginning of the procedure. During general anaesthesia, minipigs were continuous monitored for HR, respiratory rate, SpO2, capnography, invasive blood pressure and inspired and expired fraction of gases (oxygen, ETCO2).

In case of recovery anaesthesia, sevoflurane was stopped and minipigs were weaned from the ventilator and transported back to the facility when able to breath spontaneously under direct supervision, fluid therapy and oxygen supplemntation. During the transport, dexmedetomine was administered at constant rate infusion (CRI) of 1-2 mcg/kg/min. Once back in the Experimental Surgery Facility, minipigs were placed in a recovery box and the trachea extubated when the swallowing reflex was present. Minipigs were monitored with a pulse-oximeter and supplemented with oxygen through a face mask until able to stand and walk.

In case of terminal anaesthesia, euthanasia was performed at the end of the scan with an overdose of pentobarbital (100 mg/kg IV).
